# Supplementary material for: MiRNA expression profiles in the brains of mice infected with scrapie agents 139A, ME7 and S15
Source: PubMed Central journal article supplement (PMC5148024; doi:10.1038/emi.2016.120), 2016-11-09
Supplement: emi2016120x1.pdf [file emi2016120x1.pdf]

**Supplemental Figure 1.**

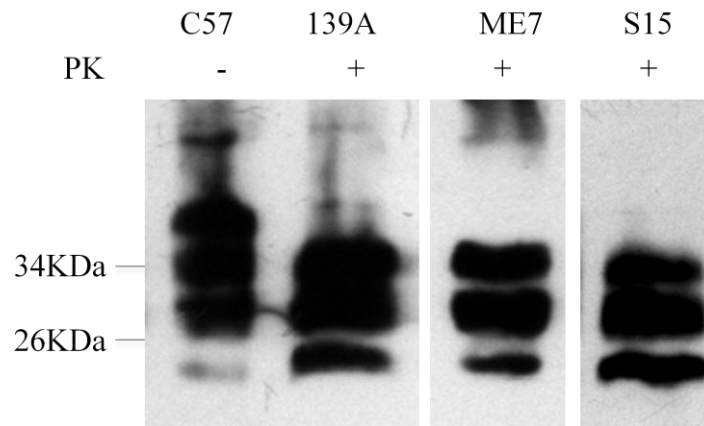

**Supplementary Figure S1** Representative Western blots of PK-resistant PrP<sup>Sc</sup> in the brains of the mice infected with scrapie agents 139A, ME7 or S15. Here, 10% various brain homogenates treated with 50 mg/mL PK (PK+) or without PK (PK-) were separated with 15% SDS-PAGE and blotted with PrP-specific monoclonal antibody 6H4<sup>12</sup>. The molecular markers are shown on the left.
