# Supplementary material for: MiRNA expression profiles in the brains of mice infected with scrapie agents 139A, ME7 and S15
Source: PubMed Central journal article supplement (PMC5148024; doi:10.1038/emi.2016.120), 2016-11-09
Supplement: emi2016120x2.pdf [file emi2016120x2.pdf]

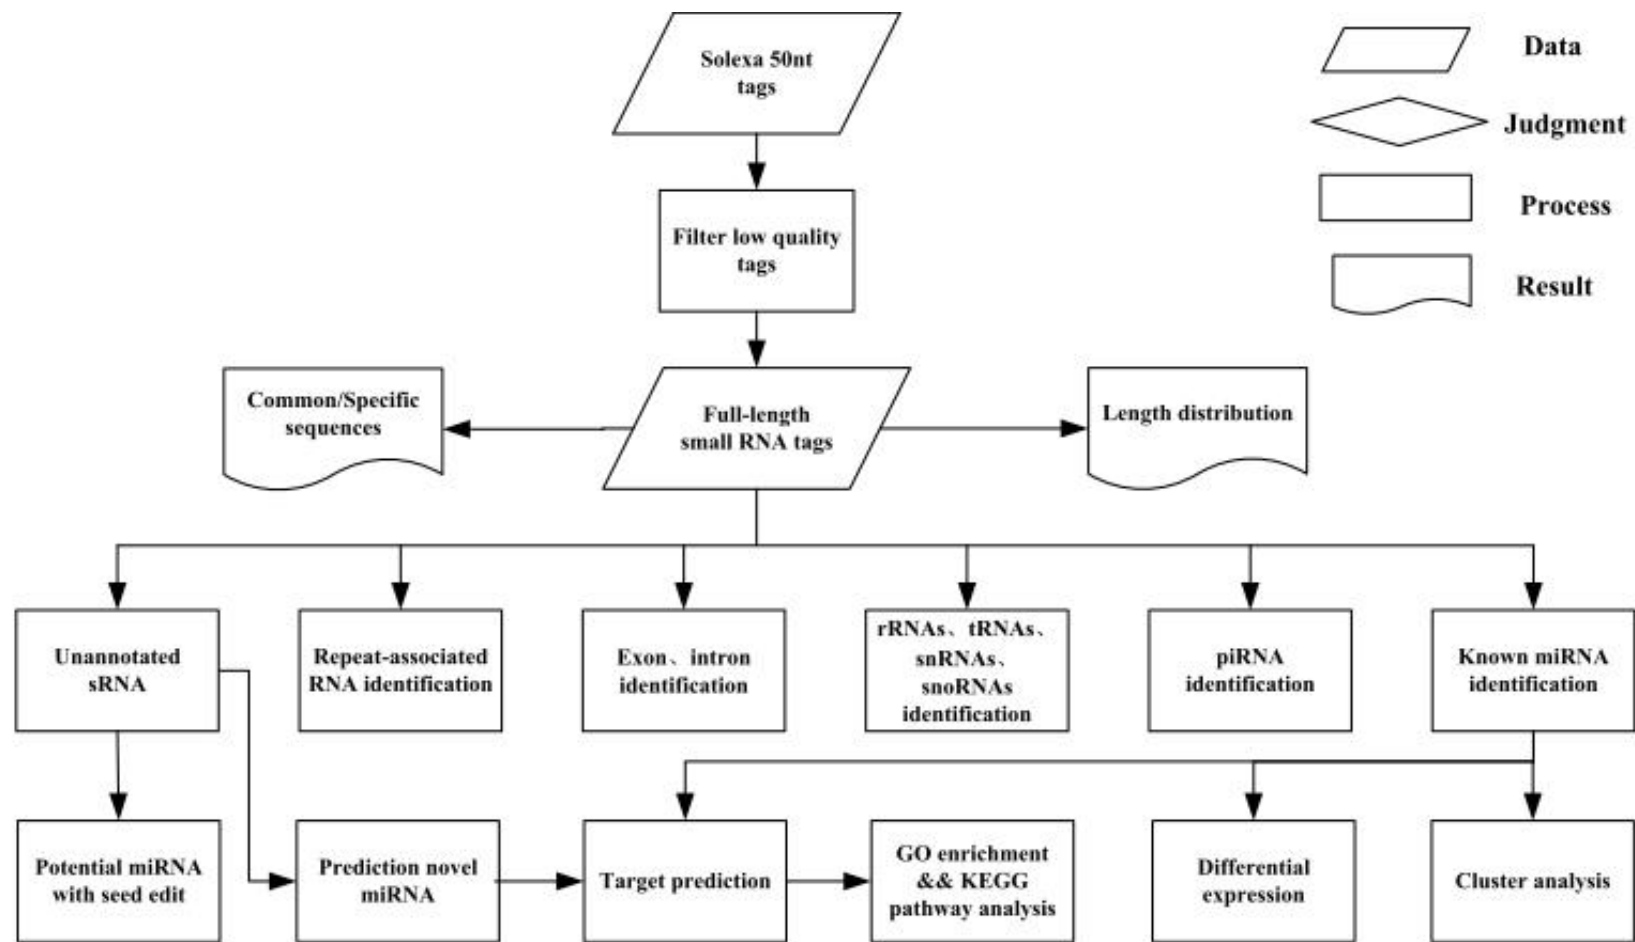

Supplementary Figure S2 Data processing flow chart of miRNAs.
