# Supplementary material for: MiRNA expression profiles in the brains of mice infected with scrapie agents 139A, ME7 and S15
Source: PubMed Central journal article supplement (PMC5148024; doi:10.1038/emi.2016.120), 2016-11-09
Supplement: emi2016120x3.pdf [file emi2016120x3.pdf]

**Supplementary Table S1** Summary of data cleaning

| Items                  | Ctrl     |       | 139A     |       | ME7      |       | S15      |       |
|------------------------|----------|-------|----------|-------|----------|-------|----------|-------|
|                        | numbers  | 0.00% | numbers  | 0.00% | numbers  | 0.00% | numbers  | 0.00% |
| total reads            | 12000000 |       | 12000000 |       | 12000000 |       | 12000000 |       |
| high quality           | 11934983 | 100   | 11914868 | 100%  | 11924422 | 100   | 11885292 | 100   |
| 3'adapter null         | 14099    | 0.12  | 19352    | 0.16  | 13928    | 0.12  | 18847    | 0.16  |
| insert null            | 3482     | 0.03  | 3313     | 0.03  | 4973     | 0.04  | 5400     | 0.05  |
| 5'adapter contaminants | 18231    | 0.15  | 24413    | 0.2   | 18808    | 0.16  | 15674    | 0.13  |
| smaller than 18nt      | 49607    | 0.42  | 84869    | 0.71  | 213120   | 1.79  | 680322   | 5.72  |
| polyA                  | 328      | 0     | 430      | 0     | 515      | 0     | 446      | 0     |
| clean read             | 11849236 | 99.28 | 11782491 | 98.89 | 11673078 | 97.89 | 11164603 | 93.94 |
