# Supplementary material for: MiRNA expression profiles in the brains of mice infected with scrapie agents 139A, ME7 and S15
Source: PubMed Central journal article supplement (PMC5148024; doi:10.1038/emi.2016.120), 2016-11-09
Supplement: emi2016120x4.pdf [file emi2016120x4.pdf]

**Supplementary Table S2** Read abundances of small RNAs in three infected mice brain and health mouse libraries.

| Items            | Ctrl        |        | 139A        |        | ME7         |        | S15         |        |
|------------------|-------------|--------|-------------|--------|-------------|--------|-------------|--------|
|                  | Total sRNAs | %      | Total sRNAs | %      | Total sRNAs | %      | Total sRNAs | %      |
| Total            | 11849236    | 100%   | 11782491    | 100%   | 11673078    | 100%   | 11164603    | 100%   |
| exon_antisense   | 1074        | 0.01%  | 3612        | 0.03%  | 3674        | 0.03%  | 6797        | 0.06%  |
| exon_sense       | 71004       | 0.6%   | 507844      | 4.31%  | 384343      | 3.29%  | 568502      | 5.09%  |
| intron_antisense | 4681        | 0.04%  | 33982       | 0.29%  | 32803       | 0.28%  | 36655       | 0.33%  |
| intron_sense     | 50725       | 0.43%  | 226961      | 1.93%  | 198233      | 1.7%   | 393241      | 3.52%  |
| miRNA            | 7242379     | 61.12% | 5358725     | 45.48% | 5417857     | 46.41% | 3037591     | 27.21% |
| rRNA             | 1949028     | 16.45% | 2795529     | 23.73% | 2835909     | 24.29% | 4130969     | 37%    |
| repeat           | 44972       | 0.38%  | 159323      | 1.35%  | 151950      | 1.3%   | 265750      | 2.38%  |
| scRNA            | 14458       | 0.12%  | 101387      | 0.86%  | 69644       | 0.6%   | 111798      | 1%     |
| snRNA            | 31784       | 0.27%  | 75540       | 0.64%  | 82245       | 0.7%   | 403625      | 3.62%  |
| snoRNA           | 18419       | 0.16%  | 95357       | 0.81%  | 78921       | 0.68%  | 182064      | 1.63%  |
| srpRNA           | 3528        | 0.03%  | 10305       | 0.09%  | 6895        | 0.06%  | 25282       | 0.23%  |
| tRNA             | 127727      | 1.08%  | 389850      | 3.31%  | 435624      | 3.73%  | 472900      | 4.24%  |
| Unann*           | 2289457     | 19.32% | 2024076     | 17.18% | 1974980     | 16.92% | 1529429     | 13.7%  |

\*unann: unannotated small RNAs
