# Supplementary material for: MiRNA expression profiles in the brains of mice infected with scrapie agents 139A, ME7 and S15
Source: PubMed Central journal article supplement (PMC5148024; doi:10.1038/emi.2016.120), 2016-11-09
Supplement: emi2016120x5.pdf [file emi2016120x5.pdf]

**Supplementary Table S3.** The miRNAs numbers of the reads in the three scrapie infected mice and normal control

| miRNA               | Number of reads |      |      |      |
|---------------------|-----------------|------|------|------|
|                     | Ctrl            | 139A | ME7  | S15  |
| <b>Up-regulated</b> |                 |      |      |      |
| mmu-miR-1291        | 10              | 33   | 36   | 27   |
| mmu-miR-142-5p      | 289             | 704  | 884  | 667  |
| mmu-miR-146a-5p     | 140             | 481  | 1384 | 797  |
| mmu-miR-1940        | 31              | 101  | 110  | 858  |
| mmu-miR-217-5p      | 17              | 50   | 43   | 70   |
| mmu-miR-27a-3p      | 160             | 466  | 858  | 637  |
| mmu-miR-298-5p      | 501             | 1556 | 1060 | 1545 |
| mmu-miR-3068-3p     | 69              | 200  | 162  | 296  |
| mmu-miR-331-3p      | 154             | 356  | 586  | 402  |
| mmu-miR-341-3p      | 416             | 2301 | 3818 | 3339 |
