# Supplementary material for: MiRNA expression profiles in the brains of mice infected with scrapie agents 139A, ME7 and S15
Source: PubMed Central journal article supplement (PMC5148024; doi:10.1038/emi.2016.120), 2016-11-09
Supplement: emi2016120x6.pdf [file emi2016120x6.pdf]

**Supplementary Table S4.** Novel miRNAs numbers of the reads in the three scrapie infected mice and normal control

| miRNA        | Number of reads |      |     |     |
|--------------|-----------------|------|-----|-----|
|              | Ctrl            | 139A | ME7 | S15 |
| novel-mir-2  | 425             | 64   | 65  | 24  |
| novel-mir-17 | 129             | 0    | 134 | 0   |
| novel-mir-20 | 14              | 0    | 0   | 0   |
| novel-mir-28 | 0               | 0    | 24  | 9   |
| novel-mir-36 | 0               | 0    | 24  | 0   |
